# Supplementary material for: Development of Tofacitinib Loaded pH-Responsive Chitosan/Mucin Based Hydrogel Microparticles: In-Vitro Characterization and Toxicological Screening
Source: MDPI journal article supplement (doi:10.3390/gels9030187), 2023-02-28
Supplement: s1 [file s1]

Table S1: Results of 10% weight loss and Char yield at 500 °C

| Sample | Temperature (°C) at t = 0 | Time for desired temperature (min) | Char Yield* | Temperature (°C) /time for 10% mass loss (min) |
|--------|---------------------------|------------------------------------|-------------|------------------------------------------------|
| B      | 27.15                     | 32.19                              | 7.33%       | 258.19/ 7.14                                   |
| C      | 27.12                     | 32.28                              | 32.14%      | 76.83/ 3.99                                    |
| D      | 26.67                     | 32.29                              | 33.44%      | 198.23/ 12.31                                  |
| E      | 27.07                     | 32.53                              | 11.47%      | 171.88/ 10.7                                   |
| F      | 26.9                      | 32.51                              | 45.85%      | 113.3s/ 6.74                                   |

\* Char Yield = [(Wf)/Wi]\*100

Where Wi equal lto 9 mg for all samples
